# Supplementary material for: Algal Magnetic Nickel Oxide Nanocatalyst in Accelerated Synthesis of Pyridopyrimidine Derivatives
Source: Research Square preprint supplement (doi:10.21203/rs.3.rs-113388/v1), 2020-11-30
Supplement: Supplementary file 1 [file 8320e6089f2633330b32730b.docx]

**Algal Magnetic Nickel Oxide Nanocatalyst in Accelerated Synthesis of** **Pyridopyrimidine Derivatives**

Javad Moavia, Foad Buazara*****, Mohammad Hosein Sayahib

aDepartment of Marine Chemistry, Khorramshahr University of Marine Science and Technology, P.O. Box 669, Khorramshahr, Iran

bDepartment of Chemistry, Payame Noor University, P.O. Box 19395-3697, Tehran, Iran

*****Corresponding author: [fb@kmsu.ac.ir](mailto:fb@kmsu.ac.ir) (F. Buazar)

Tel.: (0098) 9161150684; Fax: (0098) 6153533322

***7*‑*phenyl*‑*10*‑*thioxo*‑*7,10,11,12*‑*tetrahydro*‑*6H*‑*chromeno[3*′*,4*′*:5,6]pyrido[2,3*‑*d]pyrimidine*‑*6,8(9H)*‑*dione* (5a)**

FT-IR (KBr, cm−1): 3387, 3237, 1671, 1633, 1610, 1494; 1447, 1366, 1231, 1197, 1117, 757, 552, 537.

1HNMR (DMSO-*d6*, 250 MHz) δ (ppm): 5.70 (s, CH-Ar, 1H), 7.10-7.71 (m, ArH, 8H), 7.94 (s, NH, 1H), 8.15 (m, ArH, 1H), 12.56 (s, NH, 2H).

13CNMR (DMSO-*d6*, 62.5 MHz) δ(ppm): 34.9, 96.5, 98.3, 115.9, 118.6, 124.4, 124.9, 126.0, 127.3, 127.7, 129.7, 133.6, 134.2, 134.8, 139.6, 153.1, 156.8, 164.1, 167.4, 174.8.

MS, *m/z*: 375.07 (M+); Anal. Calcd for C20H13N3O3S: C, 63.99; H, 3.49; N, 11.19; Found: C, 63.93; H, 3.55; N, 11.08.

***7-(2-chlorophenyl)-10-thioxo-7,10,11,12-tetrahydro-6H-chromeno[3',4':5,6]pyrido[2,3-d]pyrimidine-6,8(9H)-dione* (5b)**

FT-IR (KBr, cm-1): 3406, 3354, 3249, 2923, 1659, 1631, 1561, 1443, 1226, 1179, 1059, 918, 875, 760, 549, 536.

1HNMR (DMSO-*d6*, 250 MHz) δ (ppm): 5.70 (s, CH-Ar, 1H), 7.24-8.11 (m, ArH, 8H ), 7.40 (s, NH, 1H), 12.40 (s, NH, 2H).

13CNMR (DMSO-*d6*, 62.5 MHz) δ (ppm): 35.2, 95.8, 97.7, 116.0, 118.4, 124.7, 125.6, 128.3, 129.4, 130.7, 131.2, 133.8, 134.0, 138.5, 153.2, 155.3, 163.7, 164.2, 166.1, 174.6.

MS, *m/z*: 409.03 (M+); Anal. Calcd for C20H12ClN3O3S: C, 58.61; H, 2.95; N, 10.25; Found: C, 58.55; H, 2.90; N, 10.30.

***7-(3-chlorophenyl)-10-thioxo-7,10,11,12-tetrahydro-6H-chromeno[3',4':5,6]pyrido[2,3-d]pyrimidine-6,8(9H)-dione* (5c)**

FT-IR (KBr, cm-1): 3409, 3249, 2924, 1657, 1630, 1560, 1441, 1366, 1290, 1226, 1180, 1096, 875, 760, 712.

1HNMR (DMSO-*d6*, 250 MHz) δ (ppm): 5.71 (s, CH-Ar, 1H), 7.20-8.10 (m, ArH, 8H), 7.42 (s, NH, 1H), 12.3 (s, NH, 2H).

13CNMR (DMSO-*d6*, 62.5 MHz) δ (ppm): 35.3, 95.6, 97.8, 116.0, 118.4, 124.7, 125.6, 128.2, 129.4, 130.8, 131.2, 133.8, 134.0, 134.7, 138.7, 153.2, 155.2, 163.8, 166.0, 174.8.

MS, *m/z*: 409.03 (M+); Anal. Calcd for C20H12ClN3O3S: C, 58.61; H, 2.95; N, 10.25; Found: C, 58.51; H, 2.88; N, 10.32.

***7-(4-chlorophenyl)-10-thioxo-7,10,11,12-tetrahydro-6H-chromeno[3',4':5,6]pyrido[2,3-d]pyrimidine-6,8(9H)-dione* (5d)**

FT-IR (KBr, cm-1): 3395, 3347, 3241, 2931, 1669, 1635, 1609, 1596, 1568, 1489, 1436, 1232, 1197, 881, 757, 554, 536.

1HNMR (DMSO-*d6*, 250 MHz) δ (ppm): 5.67 (s, CH-Ar, 1H), 7.12-8.16 (m, ArH, 8H), 7.97 (b, NH, 1H), 12.56 (s, NH, 2H).

13CNMR (DMSO-*d6*, 62.5 MHz) δ (ppm): 34.7, 96.3, 97.9, 115.9, 118.6, 124.9, 126.0, 129.6, 129.9, 131.9, 134.2, 138.9, 153.2, 156.7, 164.1, 164.5, 167.4, 174.8.

MS, *m/z*: 409.03 (M+); Anal. Calcd for C20H12ClN3O3S: C, 58.61; H, 2.95; N, 10.25; Found: C, 58.55; H, 2.91; N, 10.19.

***7-(2,4-dichlorophenyl)-10-thioxo-7,10,11,12-tetrahydro-6H-chromeno[3',4':5,6]pyrido[2,3-d]pyrimidine-6,8(9H)-dione* (5e)**

FT-IR (KBr, cm-1): 3417, 3328, 3243, 3061, 1658, 1627, 1613, 1570, 1504, 1435, 1291, 1223, 926, 787, 613.

1HNMR (DMSO-*d6*, 250 MHz) δ (ppm): 5.68 (s, CH-Ar, 1H), 7.07-8.09 (m, ArH, 7H), 7.46 (s, NH, 1H), 12.36 (s, NH, 2H).

13CNMR (DMSO-*d6*, 62.5 MHz) δ (ppm): 35.14, 95.6, 97.3, 116.0, 118.3, 124.7, 125.6, 128.3, 130.5, 132.2, 132.9, 133.5, 133.8, 134.9, 138.0, 153.2, 155.1, 163.6, 165.8, 174.6

MS, *m/z*:442.99 (M+); Anal. Calcd for C20H11Cl2N3O3S: C, 54.07; H, 2.50; N, 9.46; Found: C, 54.14; H, 2.41; N, 9.55.

***7-(2-nitrophenyl)-10-thioxo-7,10,11,12-tetrahydro-6H-chromeno[3',4':5,6]pyrido[2,3-d]pyrimidine-6,8(9H)-dione* (5f)**

FT-IR (KBr, cm-1): 3412, 3236, 2857, 1658, 1626, 1572, 1522, 1437, 1348, 1224, 1093, 891, 865, 785, 755, 555

1HNMR (DMSO-*d6*, 250 MHz) δ (ppm): 6.17 (s, CH-Ar, 1H), 7.39-8.11 (m, ArH, 8H), 7.66 (s, NH, 1H), 12.47 (s, NH, 2H).

13CNMR (DMSO-*d6*, 62.5 MHz) δ (ppm): 32.7, 94.6, 97.1, 115.5, 118.5, 124.4, 124.8, 125.6, 125.8, 129.0, 130.4, 133.5, 133.70, 134.2, 150.9, 153.2, 156.3, 164.0, 167.5, 174.8.

MS, *m/z*:420.05 (M+); Anal. Calcd for C20H12N4O5S: C, 57.14; H, 2.88; N, 13.33; Found: C, 57.29; H, 2.78; N, 13.28.

***7-(4-Nitrophenyl)-10-thioxo-7,10,11,12-tetrahydro-6Hchromeno[3’,4’:5,6]pyrido[2,3-d]pyrimidine-6,8(9H)-dione (5g)***

FT-IR (KBr, cm-1): 3441, 3224, 2923, 1633, 1615, 1515, 1440, 1348, 1210, 1112, 847, 757, 537, 461.

1HNMR (DMSO-*d6*, 250 MHz) δ (ppm): 5.82 (s, CH-Ar, 1H); 7.40-8.16 (m,ArH, 8H), 8.10 (s, NH, 1H), 12.52 (s, NH, 2H).

13CNMR (DMSO-*d6*, 62.5 MHz) δ (ppm): 35.7, 96.0, 97.4, 115.9, 118.6, 124.7, 124.9, 125.9, 129.4, 130.1, 134.2, 147.2, 148.9, 153.2, 156.6, 164.0, 164.5, 164.6, 167.2, 174.9

MS, *m/z*:420.05 (M+); Anal. Calcd for C20H12N4O5S: C, 57.14; H, 2.88; N, 13.33; Found: C, 57.26; H, 2.91; N, 13.39

***7-(3-methoxyphenyl)-10-thioxo-7,10,11,12-tetrahydro-6H-chromeno[3',4':5,6]pyrido[2,3-d]pyrimidine-6,8(9H)-dione* (5h)**

FT-IR (KBr, cm-1): 3395, 3343, 3239, 1671, 1634, 1609, 1483, 1436, 1368, 1250, 1224, 1130, 1050, 752, 549.

1HNMR (DMSO-*d6*, 250 MHz) δ (ppm): 3.65 (s, CH3, 3H); 5.66 (s, CH-Ar, 1H), 6.61 (s, ArH, 1H), 6.68-8.17 (m, ArH, 7H), 7.95 (b, NH, 1H), 12.62 (s, NH, 2H).

13CNMR (DMSO-*d6*, 62.5 MHz) δ (ppm): 34.9, 56.4, 96.5, 98.3, 112.0, 114.3, 115.9, 118.6, 120.1, 124.9, 126.0, 130.8, 134.2, 141.4, 153.1, 156.7, 163.8, 164.1, 164.3, 167.4, 174.8.

MS, *m/z*: 405.08 (M+); Anal. Calcd for C21H15N3O4S: C, 62.21; H, 3.73; N, 10.36; Found: C, 62.15; H, 3.79; N, 10.45.

***4-(6,8-dioxo-10-thioxo-7,8,9,10,11,12-hexahydro-6H-chromeno[3',4':5,6]pyrido[2,3-d]pyrimidin-7-yl)benzonitrile (5i)***

FT-IR (KBr, cm-1): 3398, 3345, 3243, 2232, 1668, 1633, 1608, 1567, 1501, 1434, 1230, 1196, 1187, 903, 884, 755, 550.

1HNMR (DMSO-*d6*, 250 MHz) δ (ppm): 5.77 (s, CH-Ar, 1H), 7.32-8.15 (m, ArH, 8H), 7.99 (b, NH, 1H), 12.48 (s, NH, 2H).

13CNMR (DMSO-*d6*, 62.5 MHz) δ (ppm): 35.7, 95.8, 97.4, 110.0, 115.9, 118.6, 120.5, 124.9, 125.9, 129.2, 133.5, 134.2, 146.6, 153.2, 156.6, 164.1, 164.2, 164.3, 164.8, 167.2, 174.9.

MS, *m/z*: 400.06 (M+); Anal. Calcd for C21H12N4O3S: C, 62.99; H, 3.02; N, 13.99; Found: C, 62.84; H, 3.18; N, 13.88

***7-(4-Bromophenyl)-10-thioxo-7,10,11,12-tetrahydro-6Hchromeno[3’,4’:5,6]pyrido[2,3-d]pyrimidine-6,8(9H)-dione (5j)***

FT-IR (KBr, cm-1): 3397, 3344, 3241, 2926, 1668, 1635, 1611, 1485, 1434, 1338, 1231, 1198, 896, 757, 553, 483.

1HNMR (DMSO-*d6*, 250 MHz) δ (ppm): 5.65 (s, CH-Ar, 1H), 7.06-8.15 (m, ArH, 8H), 7.97 (b, NH, 1H), 12.52 (s, NH, 2H).

13CNMR (DMSO-*d6*, 62.5 MHz) δ (ppm): 34.8, 96.2, 97.8, 115.9, 118.6, 120.3, 124.8, 125.9, 130.3, 132.5, 132.4, 134.2, 139.5, 153.2, 156.6, 164.1, 164.2, 164.9, 167.3, 174.8.

MS, *m/z*: 452.98 (M+); Anal. Calcd for C20H12BrN3O3S: C, 52.88; H, 2.66, N, 9.25; Found: C, 52.93; H, 2.72, N, 9.18.

**Figure S1**. Spectroscopic data of produced pyridopyrimidines derivatives (**5a-j**)

**Figure S2.** Selected 1H NMR and 13C NMR of **5g** product.

**Figure S3.** Selected 1H NMR and 13C NMR of **5h** product.

**Figure S4.** Selected 1H NMR and 13C NMR of **5i** product.
